# Supplementary material for: RNF31 represses cell progression and immune evasion via YAP/PD-L1 suppression in triple negative breast Cancer
Source: PubMed Central journal article supplement (PMC9801641; doi:10.1186/s13046-022-02576-y), 2022-12-29

# Supplementary Figure 5

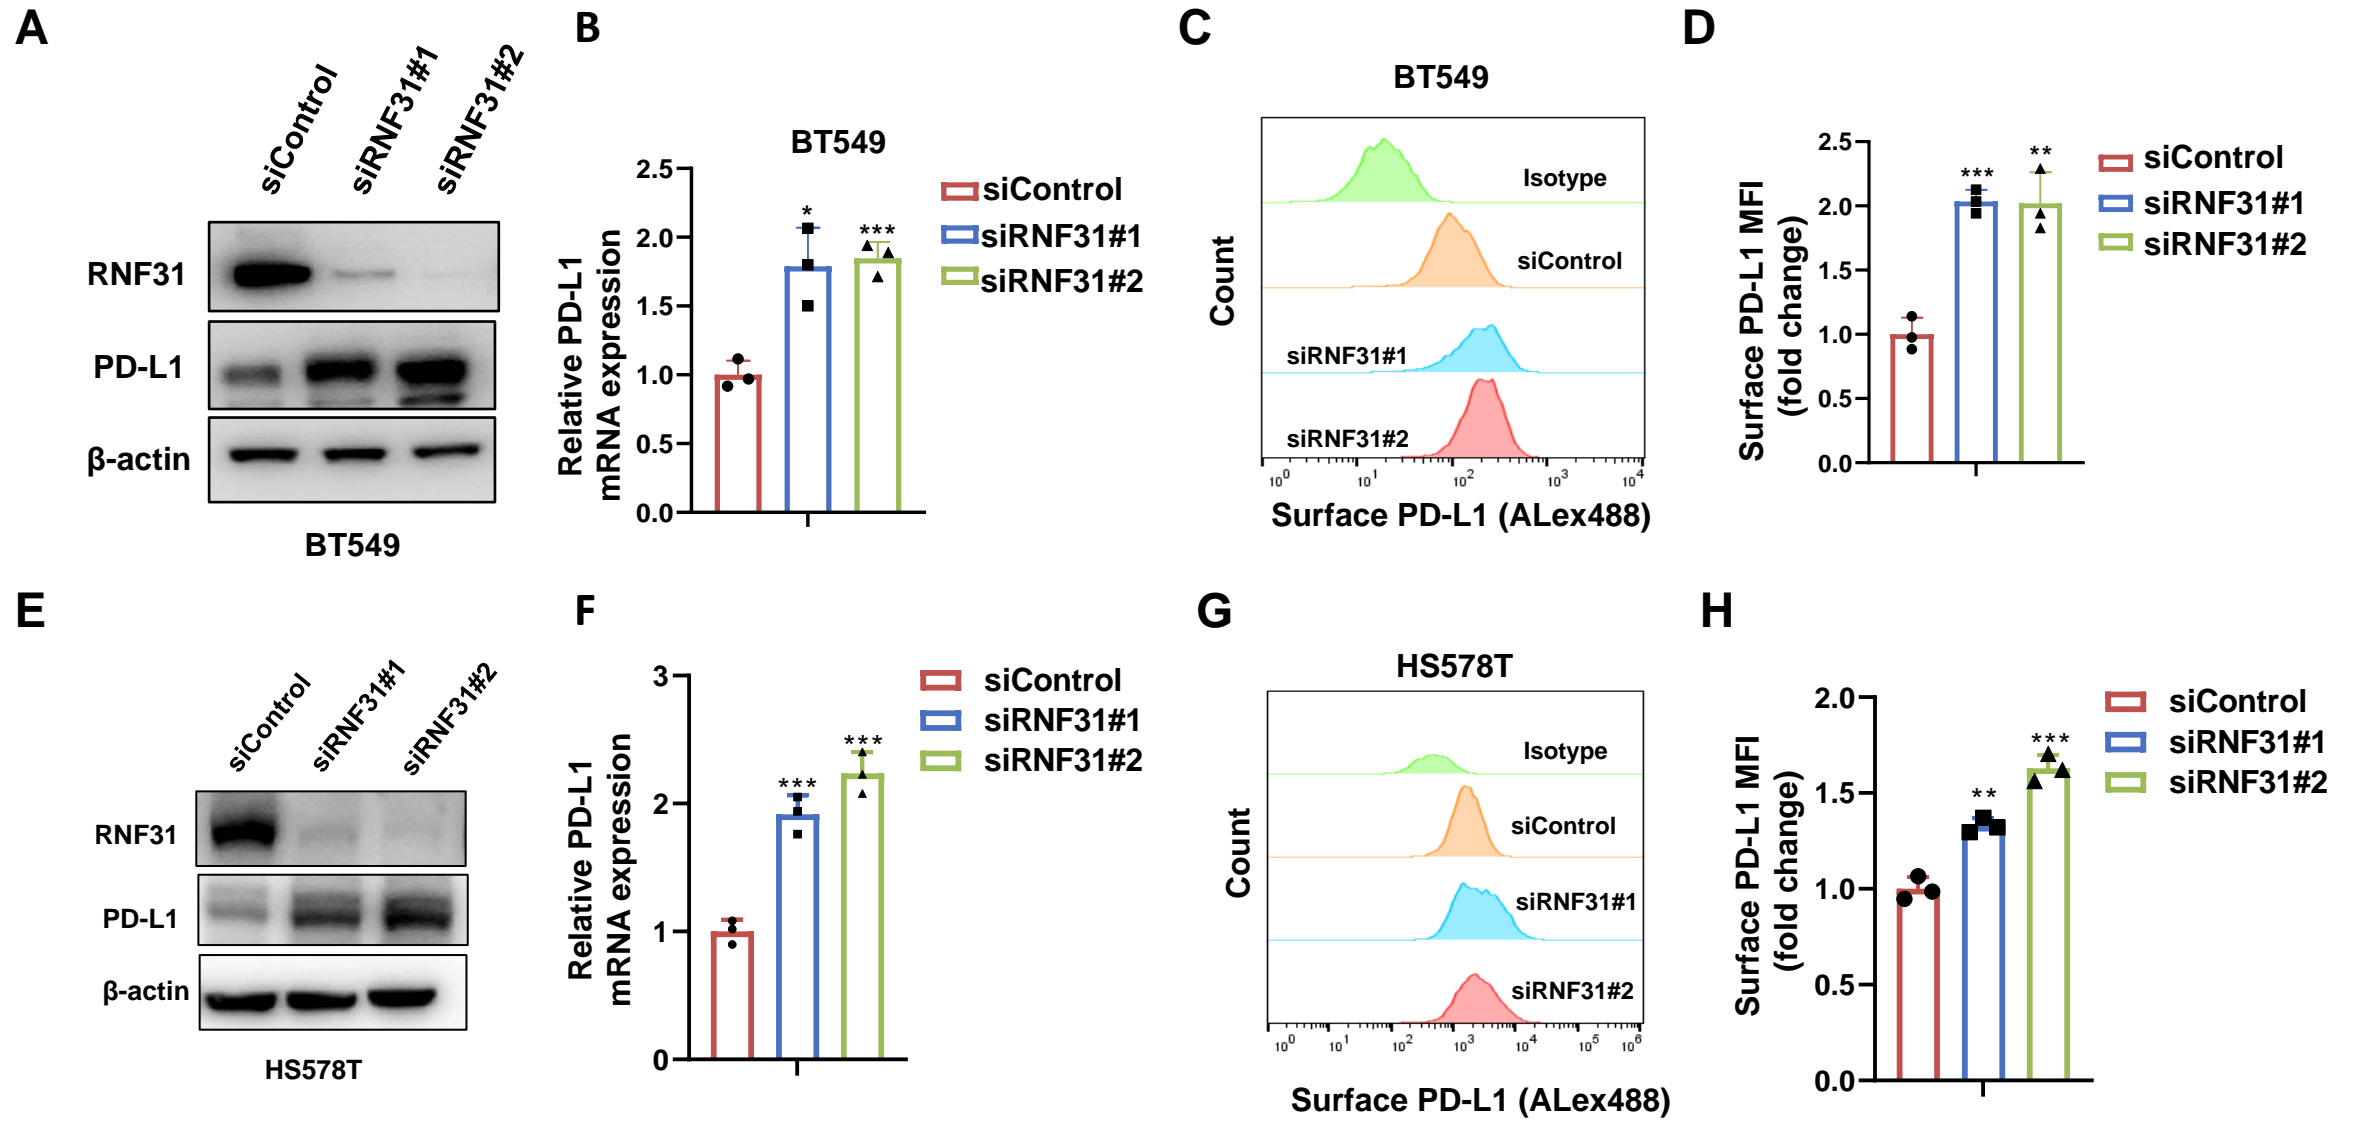

Supplement: 13046_2022_2576_MOESM5_ESM.pdf [file 13046_2022_2576_MOESM5_ESM.pdf]
